# Supplementary material for: A Hidden Feedback in Signaling Cascades Is Revealed
Source: PubMed Central journal article supplement (PMC2265423; doi:10.1371/journal.pcbi.1000041), 2008-03-21
Supplement: pcbi.1000041.s004.pdf [file pcbi.1000041.s004.pdf]

## Text S4

### Comparison variables $x_i$ and $y_i^*$

Fig. S4.1 displays the temporal evolutions corresponding to those in Figs. 3B  $A_3$  and  $B_3$  in the main text, but plotting here variable  $x_i$  instead of variable  $y_i^*$ . Variable  $x_i$  was defined as  $x_i = y_i^* + c_{i+1}$ , corresponding to the activated protein produced in cycle  $i$  and found either in the free form ( $y_i^*$ ), either being used in the next cycle of the chain ( $c_{i+1}$ ). Comparing both sets of figures, we observe that the shapes of the curves  $x_i(t)$  and  $y_i^*(t)$  are qualitatively similar, exhibiting damped oscillations in most cases. Quantitatively, however, variable  $x_i$  achieves values of one order of magnitude higher than  $y_i^*$ . Therefore these figures corroborate that the level of sequestration is indeed considerable and  $x_i$  cannot be used to estimate the available free enzyme created in cycle  $i$  of the pathway. Let us remark that for the last unit, the free enzyme is  $y_n^* = x_n$ . This explains why in our simulations we observe that  $y_n^*$  is indeed much larger than the free enzyme available in the previous cycles.

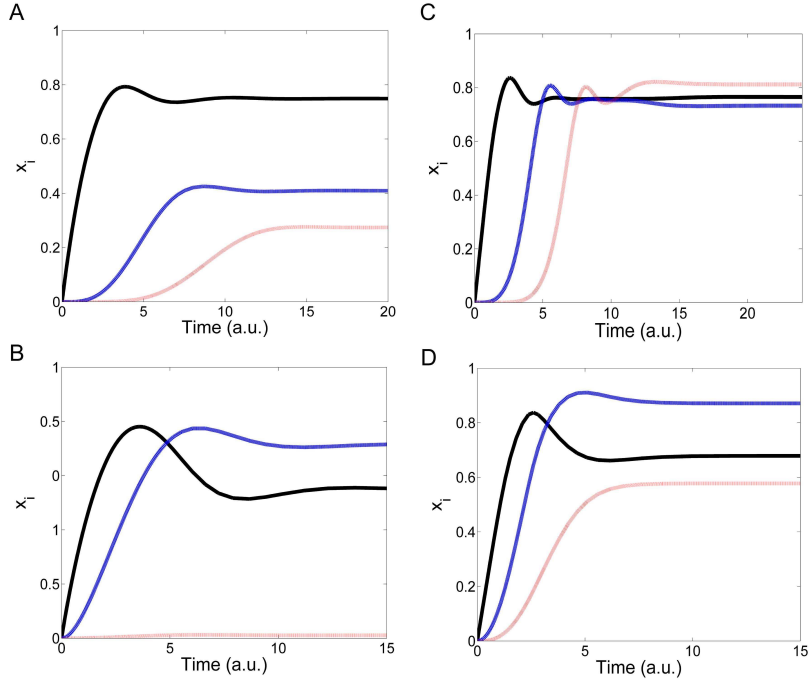

Figure S4. 1: Temporal dynamics for parameters  $A_3$  and  $B_3$  in the main text, with both  $n = 10$  and  $n = 3$ , but plotting variable  $x_i$  instead of  $y_i^*$ . a)  $A_3$  and  $n = 10$ ; b)  $B_3$  and  $n = 10$ ; c)  $A_3$  and  $n = 3$ ; d)  $B_3$  and  $n = 3$ .  $\epsilon = 0.01$ ,  $K = 0.01$ ,  $K' = K/\mu$  and  $S = 1$  for all the figures. In every case, time in arbitrary units is plotted in the horizontal axis and the temporal evolution of  $x_i$  for only three of the units in the chain is shown:  $x_1$  in filled (black) line,  $x_4$  in dashed (blue) line and  $x_7$  in dotted (red) line, for the cases with  $n = 10$ . For the cases with  $n = 3$ , the same line pattern is used for  $x_1$ ,  $x_2$  and  $x_3$ , respectively.
